# Supplementary material for: Helping Québec Pharmacists Seize the Vaccination Service Opportunity: The Pharmacy Best Practice Workshops
Source: Pharmacy (Basel). 2021 Mar 3;9(1):51. doi: 10.3390/pharmacy9010051 (PMC8005967; doi:10.3390/pharmacy9010051)

## **Supplementary Files To:**

### **Helping Québec Pharmacists Seize the Vaccination Service Opportunity:**

### **The Pharmacy Best Practice Workshops**

Kajan Srirangan, PhD, MBA <sup>1†</sup> and Arnaud Lavenue, PharmD, MSc<sup>1†</sup>

<sup>1</sup>Toc Toc Communications, 104-7030 Rue Marconi, Montréal, Québec, Canada H2S 3K1

\*Denotes equal contribution.

†Address correspondence to:

104-7030 Rue Marconi, Montréal, Québec, Canada H2S 3K1

Email: [alavenue@toctoccommunications.com](mailto:alavenue@toctoccommunications.com)

Email: [ksrirangan@toctoccommunications.com](mailto:ksrirangan@toctoccommunications.com)

March 3, 2021

## Supplementary Table 1:

**Workshop Evaluation Questionnaire.** Participants were asked to agree or disagree (on a scale of 1 to 5) with statements relating to the training workshop. Note, the original questionnaire and responses were in French and have been translated to English.

## Supplementary Figure 1:

**Mean Likert scale scores for evaluation questionnaires for the workshop (n=57).** The evaluation questionnaire used a 5-point Likert scale for the first five parts, consisting of 30 items, with anchors 'low' to 'very high'. Questions from the evaluation questionnaire are found in the **Supplementary Table 1**.

## Supplementary Table 1

### Workshop Evaluation Questionnaire

1- Very low (VL)      2- Low (L)      3- Medium (M)      4- High (H)      5- Very high (VH)

| PROFESSIONAL DEVELOPMENT                                                                             | 1<br>VL               | 2<br>L                | 3<br>M                | 4<br>H                | 5<br>VH               | N/A                   |
|------------------------------------------------------------------------------------------------------|-----------------------|-----------------------|-----------------------|-----------------------|-----------------------|-----------------------|
| 1. This workshop will have a direct influence on my practice.                                        | <input type="radio"/> |
| 2. This workshop has allowed me to improve my level of knowledge and skills.                         | <input type="radio"/> |
| 3. I will recommend this workshop to my co-workers.                                                  | <input type="radio"/> |
| WORKSHOP OBJECTIVES AND CONTENT                                                                      | 1<br>VL               | 2<br>L                | 3<br>M                | 4<br>H                | 5<br>VH               | N/A                   |
| 4. The learning objectives were clearly stated.                                                      | <input type="radio"/> |
| 5. The content met the learning objectives.                                                          | <input type="radio"/> |
| 6. The content was sufficiently detailed and precise.                                                | <input type="radio"/> |
| 7. The content was structured and easy to understand.                                                | <input type="radio"/> |
| 8. The content was organized coherently.                                                             | <input type="radio"/> |
| KNOWLEDGE TRANSFER AND INTEGRATION                                                                   | 1<br>VL               | 2<br>L                | 3<br>M                | 4<br>H                | 5<br>VH               | N/A                   |
| 9. The scenarios, clinical case studies or training questions were clearly stated.                   | <input type="radio"/> |
| 10. The clinical case studies or scenarios were relevant and applicable to pharmacies daily.         | <input type="radio"/> |
| 11. The clinical case studies or scenarios were sufficient.                                          | <input type="radio"/> |
| 12. The clinical case studies or scenarios were diverse.                                             | <input type="radio"/> |
| 13. The feedback offered from the case studies or training questions allowed for knowledge transfer. | <input type="radio"/> |
| THE FACILITATOR / SPEAKER                                                                            | 1<br>VL               | 2<br>L                | 3<br>M                | 4<br>H                | 5<br>VH               | N/A                   |

|                                                                                                   |                                                                                                                                                                                                                                         |                       |                       |                       |                       |                       |
|---------------------------------------------------------------------------------------------------|-----------------------------------------------------------------------------------------------------------------------------------------------------------------------------------------------------------------------------------------|-----------------------|-----------------------|-----------------------|-----------------------|-----------------------|
| 14. The facilitator adequately presented the content and piqued my interest.                      | <input type="radio"/>                                                                                                                                                                                                                   | <input type="radio"/> | <input type="radio"/> | <input type="radio"/> | <input type="radio"/> | <input type="radio"/> |
| 15. The facilitator had good knowledge of the subject matter.                                     | <input type="radio"/>                                                                                                                                                                                                                   | <input type="radio"/> | <input type="radio"/> | <input type="radio"/> | <input type="radio"/> | <input type="radio"/> |
| 16. The facilitator fostered interaction well.                                                    | <input type="radio"/>                                                                                                                                                                                                                   | <input type="radio"/> | <input type="radio"/> | <input type="radio"/> | <input type="radio"/> | <input type="radio"/> |
| 17. The feedback offered by the speaker was relevant.                                             | <input type="radio"/>                                                                                                                                                                                                                   | <input type="radio"/> | <input type="radio"/> | <input type="radio"/> | <input type="radio"/> | <input type="radio"/> |
| 18. The speaker stated their current and potential conflicts of interest related to the workshop. | <input type="radio"/>                                                                                                                                                                                                                   | <input type="radio"/> | <input type="radio"/> | <input type="radio"/> | <input type="radio"/> | <input type="radio"/> |
| <b>THE ASSESSMENT</b>                                                                             | <b>1<br/>VL</b>                                                                                                                                                                                                                         | <b>2<br/>L</b>        | <b>3<br/>M</b>        | <b>4<br/>H</b>        | <b>5<br/>VH</b>       | <b>N/A</b>            |
| 19. The assessment questions reflected the content covered in the workshop.                       | <input type="radio"/>                                                                                                                                                                                                                   | <input type="radio"/> | <input type="radio"/> | <input type="radio"/> | <input type="radio"/> | <input type="radio"/> |
| 20. The assessment measured the achievement of the learning objectives well.                      | <input type="radio"/>                                                                                                                                                                                                                   | <input type="radio"/> | <input type="radio"/> | <input type="radio"/> | <input type="radio"/> | <input type="radio"/> |
| 21. The difficulty level of the assessment was adequate.                                          | <input type="radio"/>                                                                                                                                                                                                                   | <input type="radio"/> | <input type="radio"/> | <input type="radio"/> | <input type="radio"/> | <input type="radio"/> |
| 22. The feedback provided from the assessment was sufficient.                                     | <input type="radio"/>                                                                                                                                                                                                                   | <input type="radio"/> | <input type="radio"/> | <input type="radio"/> | <input type="radio"/> | <input type="radio"/> |
| <b>GRAPHIC DESIGN AND MEDIA</b>                                                                   | <b>1<br/>VL</b>                                                                                                                                                                                                                         | <b>2<br/>L</b>        | <b>3<br/>M</b>        | <b>4<br/>H</b>        | <b>5<br/>VH</b>       | <b>N/A</b>            |
| 23. The graphics used in the teaching material were consistent and professional.                  | <input type="radio"/>                                                                                                                                                                                                                   | <input type="radio"/> | <input type="radio"/> | <input type="radio"/> | <input type="radio"/> | <input type="radio"/> |
| 24. The graphical elements (photos, illustrations, diagrams, animations, etc.) were clear.        | <input type="radio"/>                                                                                                                                                                                                                   | <input type="radio"/> | <input type="radio"/> | <input type="radio"/> | <input type="radio"/> | <input type="radio"/> |
| 25. The graphical elements added value to the teaching material.                                  | <input type="radio"/>                                                                                                                                                                                                                   | <input type="radio"/> | <input type="radio"/> | <input type="radio"/> | <input type="radio"/> | <input type="radio"/> |
| 26. The downloadable documents (tools, tables, appendices) were relevant and met my needs.        | <input type="radio"/>                                                                                                                                                                                                                   | <input type="radio"/> | <input type="radio"/> | <input type="radio"/> | <input type="radio"/> | <input type="radio"/> |
| 27. The navigation was easy.                                                                      | <input type="radio"/>                                                                                                                                                                                                                   | <input type="radio"/> | <input type="radio"/> | <input type="radio"/> | <input type="radio"/> | <input type="radio"/> |
| 28. The interactive elements were working properly.                                               | <input type="radio"/>                                                                                                                                                                                                                   | <input type="radio"/> | <input type="radio"/> | <input type="radio"/> | <input type="radio"/> | <input type="radio"/> |
| 29. Case studies were well integrated into online components of the workshop.                     | <input type="radio"/>                                                                                                                                                                                                                   | <input type="radio"/> | <input type="radio"/> | <input type="radio"/> | <input type="radio"/> | <input type="radio"/> |
| <b>GENERAL STATEMENTS</b>                                                                         | <b>1<br/>VL</b>                                                                                                                                                                                                                         | <b>2<br/>L</b>        | <b>3<br/>M</b>        | <b>4<br/>H</b>        | <b>5<br/>VH</b>       | <b>N/A</b>            |
| 30. The length of the workshop activity was enough to cover the topic addressed.                  | <input type="radio"/>                                                                                                                                                                                                                   | <input type="radio"/> | <input type="radio"/> | <input type="radio"/> | <input type="radio"/> | <input type="radio"/> |
| 31. The workshop had no commercial bias.                                                          | <input type="radio"/> Yes<br><input type="radio"/> No, justify your answer                                                                                                                                                              |                       |                       |                       |                       |                       |
| 32. The online registration process was satisfactory.                                             | <input type="radio"/> Yes<br><input type="radio"/> No, justify your answer                                                                                                                                                              |                       |                       |                       |                       |                       |
| 33. How did you find out about this activity?                                                     | <input type="radio"/> College Website<br><input type="radio"/> College Publications<br><input type="radio"/> Catalogue of the Training Portal<br><input type="radio"/> Employer/Colleague<br><input type="radio"/> Other, specify _____ |                       |                       |                       |                       |                       |
| <b>DEVELOPMENT QUESTIONS</b>                                                                      |                                                                                                                                                                                                                                         |                       |                       |                       |                       |                       |

|                                                                      |  |
|----------------------------------------------------------------------|--|
| 34. What were the strengths of the workshop?                         |  |
| 35. What improvements would you make to this workshop?               |  |
| 36. What topics would you like to see addressed in future workshops? |  |

Supplementary Figure 1

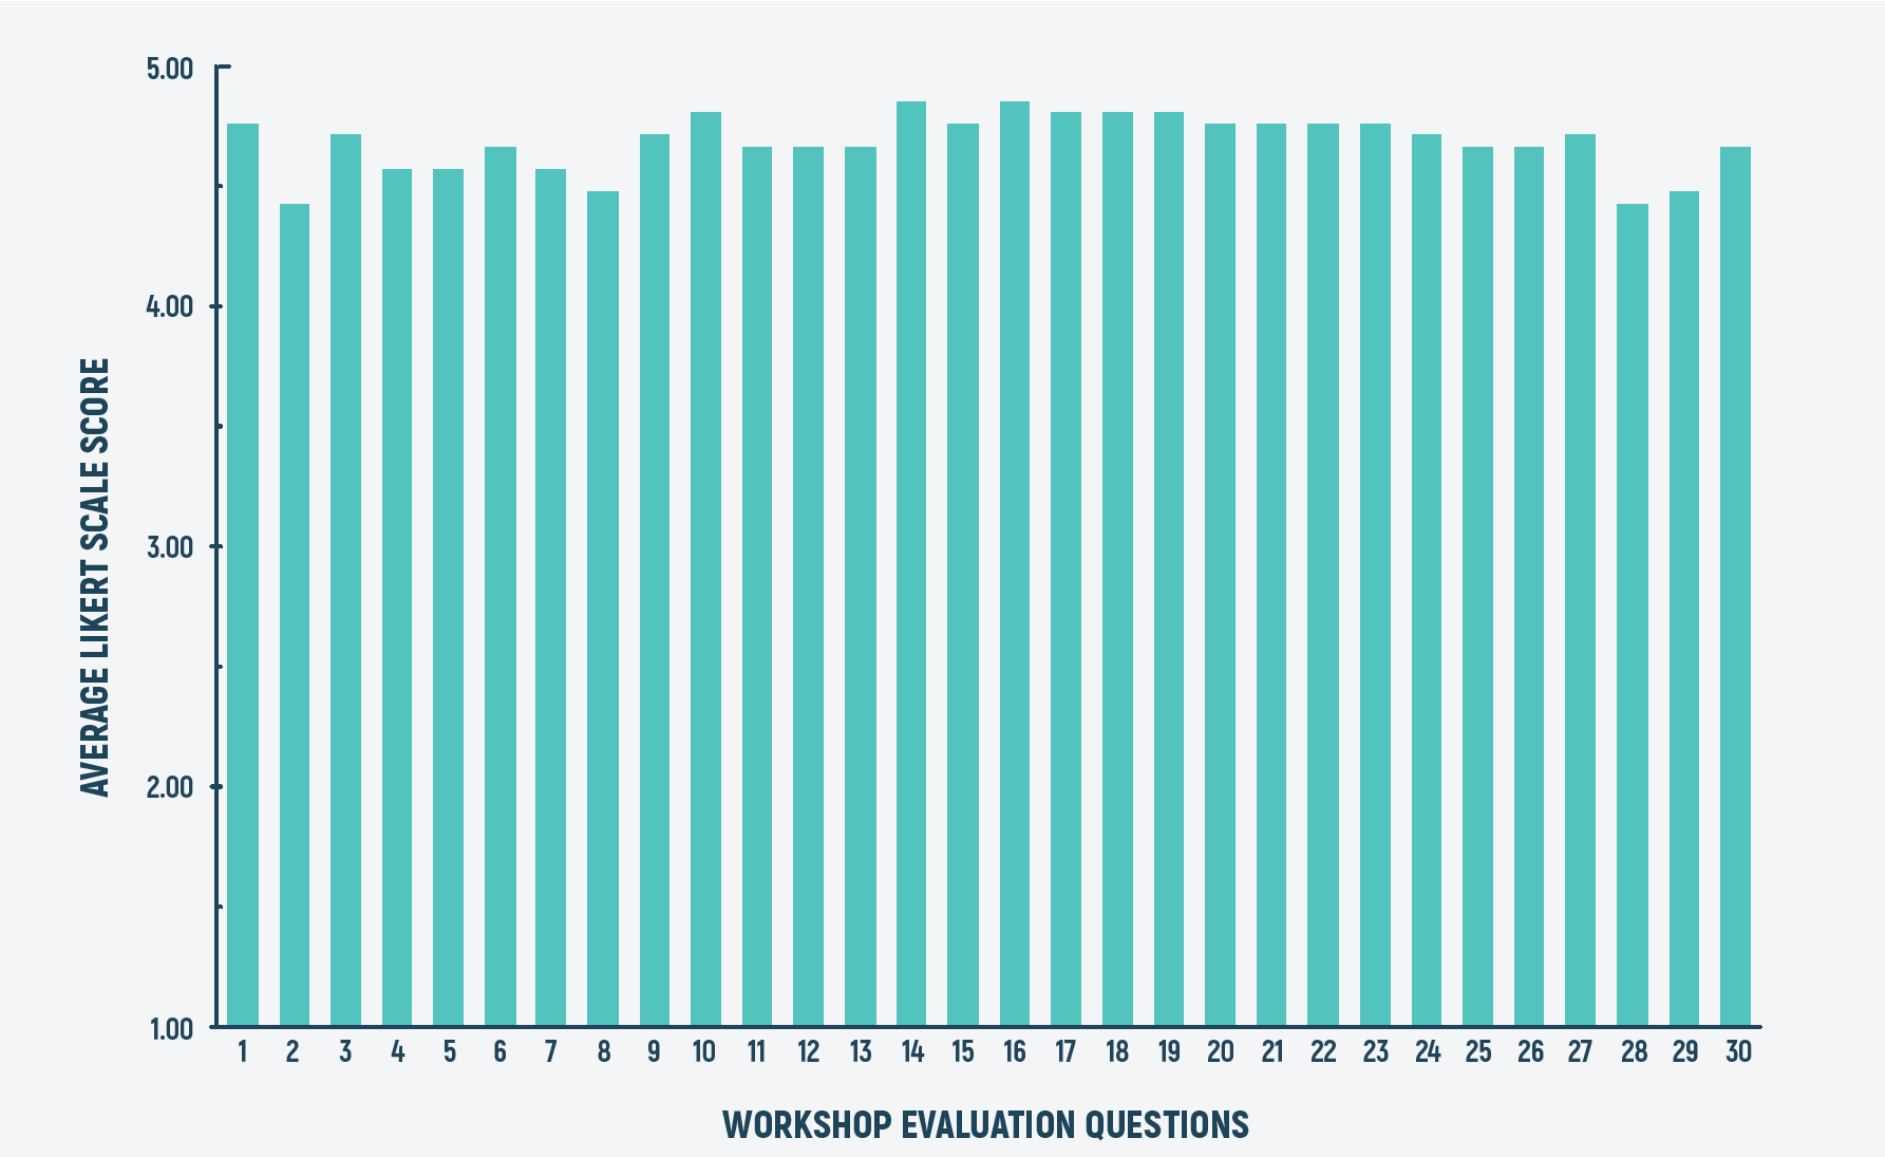

Supplement: Supplementary file 1 [file pharmacy-09-00051-s001.pdf]
